# Supplementary material for: Putative SF2 helicases of the early-branching eukaryote Giardia lamblia are involved in antigenic variation and parasite differentiation into cysts
Source: PubMed Central journal article supplement (PMC3566956; doi:10.1186/1471-2180-12-284), 2012-11-28
Supplement: 1471-2180-12-284-S5.pdf [file 1471-2180-12-284-S5.pdf]

## Motifs

| ORF    | F | Q          | I        | Ia           | Ic      | II        | III | IV      | V             | VI            |
|--------|---|------------|----------|--------------|---------|-----------|-----|---------|---------------|---------------|
| 13220  | W | GYTKPRAIQ  | AETGSGKT | IIAPTRELATQ  | VGTPGRL | VIDESDKM  | SAT | IIIEVKI | LITTDVCARGLD  | HIHRVGRAARVE  |
| 15555  | W | SFTNMTIPVQ | AETGSGKT | IVAPTQVLAQQ  | VATPGRL | IIDEADQV  | SAT | IVFFMT  | LETTDISARGLD  | YTHRAGRTARCY  |
| 14098  | F | GFKTMTPIQ  | SRTGSGKT | ILLPTAELCVQ  | IATPGRL | IEFDEVNLI | TAT | VIEFVAT | LITTDMCARGVD  | YAHRAGRAARMN  |
| 90950  | F | GYSTLTSIQ  | SKTGSGKT | VIAPTRELVCVQ | VCTPGRI | CFDES DRM | SAT | LVEFVAT | LISTDVAARGID  | YVHRVGRSARAG  |
| 17239  | M | GYTSLRPIQ  | SRTATGKT | VICPTRILLCEQ | VATPGIL | VLDEYDDL  | SAT | IVFFLL  | LETTDLGARGLD  | FIHRIGRACRMG  |
| 2098   | F | GFQQLTPVQ  | AKNGTGKT | VLHPTRELAMQ  | LATPGRL | VLDEADML  | SAT | IVFVNS  | LIA TELFTRGID | YIHRAGRACRGD  |
| 16887  | F | GHKNMTRIQ  | AHTGSGKS | VLTPPTRELALQ | IATPGRL | ILDEADML  | SAT | IVFLSS  | LLATNVAARGLD  | YIHRAGRACRGD  |
| 95898  | F | TITVPTDIQ  | ARTGSGKT | VLTPPTRELALQ | IATPGRL | VLDEADRL  | TAT | IIETDT  | LVATDLASRGLD  | YIHRVGRTCRAG  |
| 9119   | F | GWLEPTAIQ  | AETGSGKT | VLSPTRELAVQ  | ICTPGRL | IIDEADKM  | SAT | MVFATK  | LLASDVAGRGID  | YVHRAGRTARAG  |
| 13791  | W | GWKFPTTVQ  | AVTGSGKT | ILSPTRELAAQ  | VATPGRL | VLDEGDKM  | SAT | MVFCNS  | LVCSDVASRGLD  | HIHRVGRIGRAD  |
| 15048  | F | KYFQPTPIQ  | SQTGSGKT | IMSPTRELVQQ  | VATPGRL | VEDECDRM  | SAT | IVFTNF  | LIGTDVAQRGLD  | YTHRIGRTGRAG  |
| 34684  | L | RYTQPTPIQ  | SQTGSGKT | ILSPTRELTOQ  | IATPGRL | VLDEADKM  | SAT | LIEFVET | LVATDVAQRGID  | YIHRIGRTGRAG  |
| 16042  | F | QVHNPTFIQ  | AQTGSGKT | IVSPTKELAMQ  | SGTPGRI | VLDECDQL  | SAT | LVFAET  | LVATDVAARGLN  | YVHRVGRACRMG  |
| 17497  | F | KFSKPTCVQ  | AETGSGKT | VFAPARELASQ  | VITPGIF | VLDECDAL  | SAT | IVFVNK  | LVATDAVARGVH  | YVHRCGRIGRAG  |
| 6283   | W | GFHMPTKTQ  | APTGTGKT | IIAPT KILCRO | IGTIHSL | IIDEADYF  | SAT | IIIECKT | LITTDGLARGID  | YTHRIGRCGRFG  |
| 13156  | F | GFEIPSPVQ  | AQTGSGKT | II SPTKELSNO | CVTPKRL | ILDECDKL  | SAT | VIEFCNS | LISTDLLARGED  | YMHRAGRCGRFG  |
| 10255  | F | GYKIPSAIQ  | AQSGTGKT | ILSPTRELALQ  | VATPGRL | VLDEADEM  | SAT | VIEFCNS | LIA TNIIARGID | YLHRIGRSGRFG  |
| 16376  | F | GFESPSDVQ  | AKSGKGKT | VL CNTHELAMQ | VGTIGRV | VLDEFDAL  | TAT | VIEFARD | LVSTDI FQRGVD | YLHRSGRAGRFE  |
| 14451  | F | GWEVPSPVQ  | APTGSGKS | VLVPTRELADQ  | VATPLVL | VLDEVDCL  | SAS | LVEFAST | LVCTDVLARGLD  | YIHRIGRAGRQT  |
| 16806  | W | EYTQLTPVQ  | APTGSGKT | VLTPPTRELAMQ | VGVPKGV | VLDELDEL  | TAT | IIIFLAS | LITTSGGGRGLD  | YVHQIGRTARGM  |
| 96537  | W | LYEAL-PIQ  | SETGSGKT | IVVPTRELRCRO | ISTPSLV | VCDEADLI  | SAT | VIEFVNS | -----FRGLD    | YIHRIGRTARGA  |
| 113655 | W | GYTDLLPIQ  | SATGSGKT | FVVPTHELLTO  | CCTPGIV | VIDEADHI  | SAT | IVFVNS  | VLATDNFARGLD  | LTHRVGRCARGLD |
