# Supplementary material for: Putative SF2 helicases of the early-branching eukaryote Giardia lamblia are involved in antigenic variation and parasite differentiation into cysts
Source: PubMed Central journal article supplement (PMC3566956; doi:10.1186/1471-2180-12-284), 2012-11-28
Supplement: 1471-2180-12-284-S6.pdf [file 1471-2180-12-284-S6.pdf]

### Motifs

| ORF   | I        | Ia          | Ib         | II       | III | IV     | V             | VI            |
|-------|----------|-------------|------------|----------|-----|--------|---------------|---------------|
| 17387 | GSTGSGKS | VTQPRRIAAG  | FVTEGVLLKM | ILDEAHER | SAT | LIFLSG | TNVAEASITIPN  | ADQRAGRAGRTA  |
| 15930 | GSTGSGKS | VTQPRRVAAIS | YATDGVVIRE | IVDEAHER | SAT | LVFMPG | TNIAETSITVPN  | ILQRSGRAGRLM  |
| 6616  | GATGSGKS | VSEPRRVAAIS | YQTDGVTLQY | ILDEIHER | SAT | LVFLSG | TNVAETSVTIPG  | HMQRRGRVGRITQ |
| 17539 | AETGSGKS | VVQPRRIAAS  | YVTEGILLNW | ILDEVHER | SAT | LVFLPG | TNIAETSILTIPG | ADQRKGRAGREG  |
| 92739 | GPTGCGKS | LVQPRRLPTER | IATAGAAFNR | ILDEIHEE | SAT | IVFLPG | TNLCETSILTPT  | MIQRKGRVGRVVR |
| 13200 | -----    | VTQPRRVSAIS | YATEGILLRM | LIDEVHEK | SAT | LVFLPG | TNVAETSITIPD  | AVQRKGRAGRVQ  |
