# Supplementary material for: Putative SF2 helicases of the early-branching eukaryote Giardia lamblia are involved in antigenic variation and parasite differentiation into cysts
Source: PubMed Central journal article supplement (PMC3566956; doi:10.1186/1471-2180-12-284), 2012-11-28
Supplement: 1471-2180-12-284-S7.pdf [file 1471-2180-12-284-S7.pdf]

## Motifs

| ORF      | I        | Ia          | Ic      | II     | III  | IV      | V            | VI       |
|----------|----------|-------------|---------|--------|------|---------|--------------|----------|
| 9352     | APTGAGKT | YVAPLKALVHE | ATPEKLL | VFDELH | SA-T | LLFTHTR | TATLAWGVNMPA | QMAGRAGR |
| 11384    | APTSAGKS | IIAVPFVALAD | CTFEKA  | VFDEIH | SA-T | IIFVTTK | TTTISAGVNLPA | QMIGRAGR |
| 17146    | AHTSAGKT | YTTPIKALSNO | MTTEIL  | IFDEVH | SA-T | IVFAFGK | TETFAMGLNLPA | QMAGRAGR |
| 87022_R1 | APTGAGKT | YLTPMKALASE | CTPEKW  | IIDEIH | SA-T | LVFVHSR | TATLAWGVNMPC | QIEGRAGR |
| 87022_R2 | CPTGSGKT | YIAPMKALIRE | ATPEKLF | IFDELH | SANT | LIFVASR | TSTLAWGLNLPA | QMAGRAGR |
