# Supplementary material for: Putative SF2 helicases of the early-branching eukaryote Giardia lamblia are involved in antigenic variation and parasite differentiation into cysts
Source: PubMed Central journal article supplement (PMC3566956; doi:10.1186/1471-2180-12-284), 2012-11-28

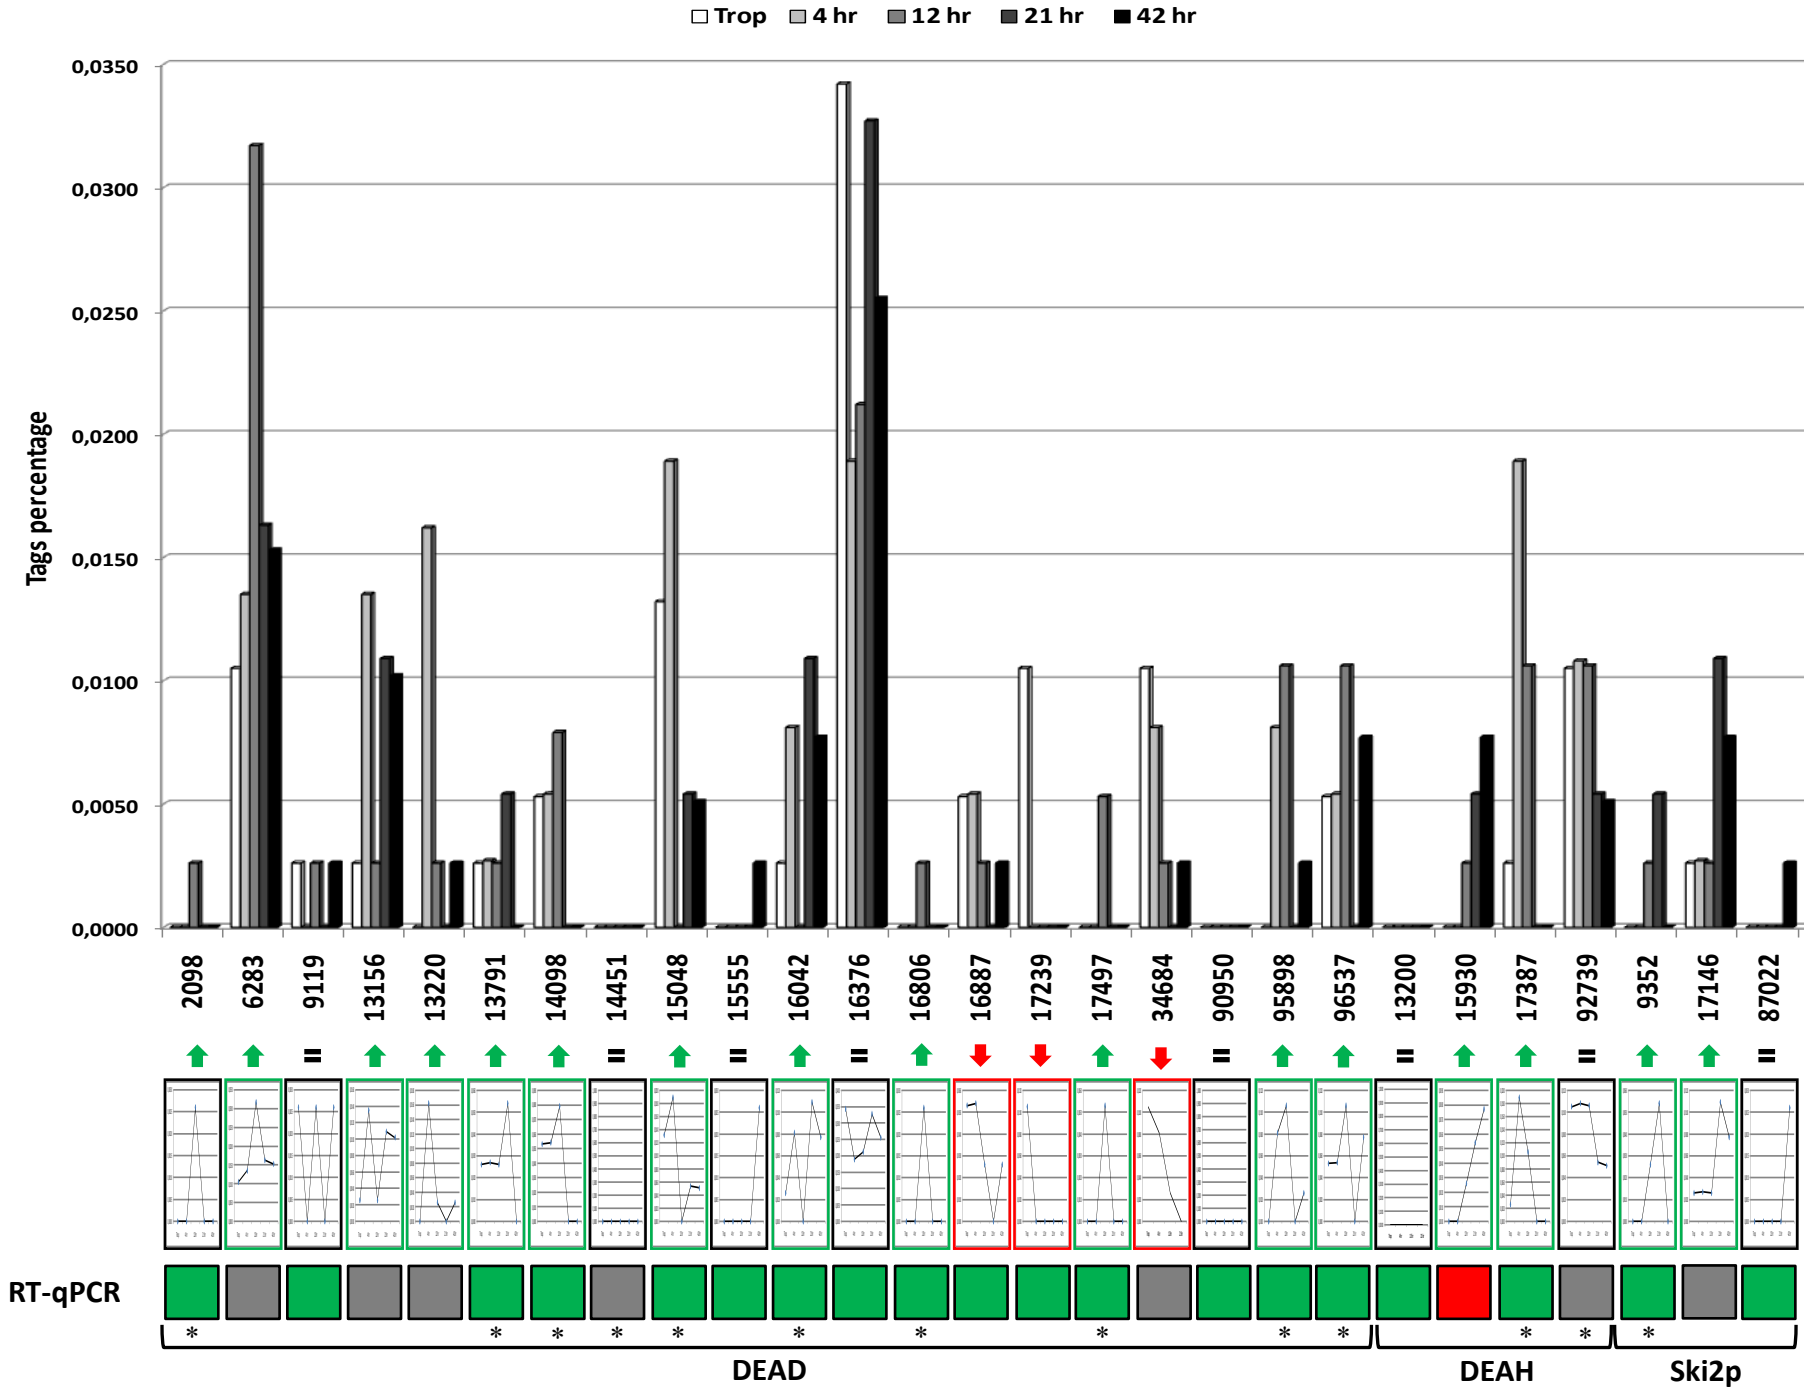

Supplement: 1471-2180-12-284-S12.pdf [file 1471-2180-12-284-S12.pdf]
